# Supplementary material for: Double-shelled hollow bimetallic phosphide nanospheres anchored on nitrogen-doped graphene for boosting water electrolysis
Source: Royal Society of Chemistry journal article supplement (doi:10.1039/d0ta06766k), 2020-01-01
Supplement: d0ta06766k1.pdf [file d0ta06766k1.pdf]

## **Double-Shelled Hollow Bimetallic Phosphide Nanospheres Anchored on Nitrogen-Doped Graphene for Boosting Water Electrolysis**

Dongxu Yang<sup>#a</sup>, Zhe Su<sup>#a</sup>, Yuanfu Chen<sup>a,b\*</sup>, Yingjiong Lu<sup>a</sup>, Bo Yu<sup>a</sup>, Katam Srinivas<sup>a</sup>, Bin Wang<sup>a</sup>,  
Wanli Zhang<sup>a</sup>

<sup>a</sup> School of Electronic Science and Engineering, and State Key Laboratory of Electronic Thin Films  
and Integrated Devices, University of Electronic Science and Technology of China, Chengdu 610054,  
PR China

<sup>b</sup> School of Science, and Institute of Oxygen Supply, Tibet University, Lhasa 850000, PR China

<sup>#</sup> D. Yang and Z. Su contribute equally in this work.

\* Corresponding author.

Email addresses: yfchen@uestc.edu.cn (Y.F. Chen)

# Supporting Information

## Experimental Section

### Catalyst Synthesis

**NiFe-MIL-88@GNS:** As a starting material, graphene oxide (GO) was synthesized using a modified Hummer's method as presented in previously report.<sup>1,2</sup> In a typical synthesis of NiFe-MIL-88@GNS, GO (60 mg) was dispersed in dimethylacetamide (DMA, 30 mL) and dispersed by ultra-sonicating for at least 30 min to obtain homogeneous solution. Next, Ni(ac)<sub>2</sub>·4H<sub>2</sub>O (180 mg) and FeCl<sub>3</sub>·6H<sub>2</sub>O (135 mg) were added into the prepared GO dispersion with stirring to obtain solution A. Then, 1, 4-BDC (83.0 mg) was added into DMA (30 mL) under stirring for 10 min to obtain transparent solution B. Subsequently, the solution A was injected into solution B and stirred several minutes, followed by adding 2 mL acetonitrile. After continuously stirring for 15 min, the mixture was transferred into a Teflon vessel (100 mL) to heat at 150 °C for 3 h before naturally cooling to room temperature. The resulting saffron precipitate was obtained through centrifugation (8500 rpm) and washed with ethanol/DMA for three times. The collected powder was dried at 60 °C overnight. In the case of mono-metallic samples, only Ni(ac)<sub>2</sub>·4H<sub>2</sub>O or FeCl<sub>3</sub>·6H<sub>2</sub>O was added.

**NiFe-P@GNS:** The as-synthesized NiFe-MIL-88@GNS were transferred into tube furnace and heated to 600 °C under N<sub>2</sub> flow (100 sccm). The heating rate was 5 °C min<sup>-1</sup> and the temperature maintains at 600°C for 2 hours. The obtained black powder was transferred into a ceramic vial, which was then placed into a Teflon vessel with 10 mL hydrazine hydrate (130 °C) for 2 hours for GO reduction and nitrogen doping to obtain NiFe-C@GNS. Then 100 mg of the pre-treated powder was placed at downstream of 500 mg NaH<sub>2</sub>PO<sub>2</sub> in a quartz boat and was heated to 300 °C for another 2 h under N<sub>2</sub> flow (50 sccm).

**NiFe-P:** The reference NiFe-P sample was synthesized using same conditions as for the NiFe-P@GNS, but without adding GO. In the case of reference samples with different Ni:Fe ratios, the feeding amount of Ni(ac)<sub>2</sub>·4H<sub>2</sub>O and FeCl<sub>3</sub>·6H<sub>2</sub>O was adjusted accordingly.

### Electrochemical measurements

HER and OER evaluations were carried out using a three-electrode configuration, where a Hg/HgO electrode was used as reference electrode and a graphite rod was used as counter electrode. To prepare the working electrode, catalyst powders (4 mg) were dispersed in a 3:1 mixture of deionized water and ethanol (total 1 mL) added with 50 μL of 5 wt % Nafion solution. 5 μL of the dispersed ink was dropped and dried onto the 3 mm glassy carbon electrode

to give a loading amount of  $0.27 \text{ mg cm}^{-2}$ . To activate the catalyst materials, CV cycling was performed on the work electrodes for more than 30 cycles before measurements. During the linear sweep voltammetry (LSV), scan rate of  $5 \text{ mV s}^{-1}$  was used. For the electrochemical impedance spectroscopy (EIS) test, AC frequency range was set from  $10^5$  to  $10^{-1} \text{ Hz}$ . The reference electrode was calibrated to reversible hydrogen electrode (RHE) via a CV method, as shown in Fig. S1.<sup>3</sup> The potentials of reference electrodes were calibrated to be  $E_{\text{RHE}} = E_{\text{Hg/HgO}} + 0.927 \text{ V}$ . All the electrochemical data was presented without  $i$ - $R$  correction.

## References

- 1 D. Li, M.B. Muller, S. Gilje, R.B. Kaner and G.G. Wallace, *Nat. Nanotechnol.*, 2008, **3**, 101-105.
- 2 D.C. Marcano, D.V. Kosynkin, J.M. Berlin, A. Sinitskii, Z. Sun, A. Slesarev, L.B. Alemany, W. Lu and J.M. Tour, *ACS Nano*, 2010, **4**, 4806-4814.
- 3 C. Wei, R.R. Rao, J. Peng, B. Huang, I.E.L. Stephens, M. Risch, Z.J. Xu and Y. Shao-Horn, *Adv. Mater.*, 2019, **31**, 1806296.

## Figures

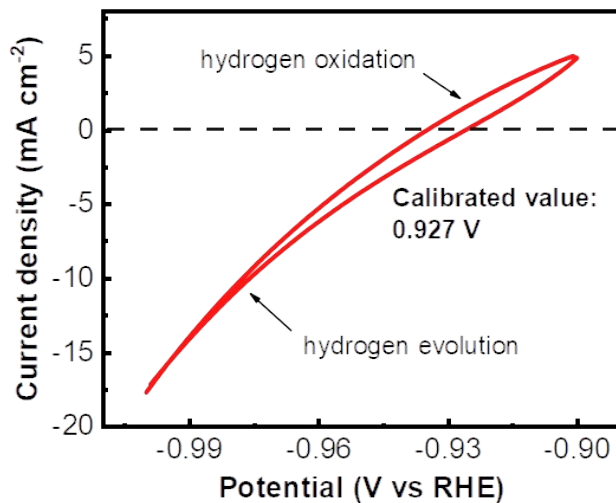

**Fig. S1.** Voltammograms of two platinum wire electrodes as both working and counter electrodes at a scan rate of  $10 \text{ mV s}^{-1}$  in  $1.0 \text{ M KOH}$

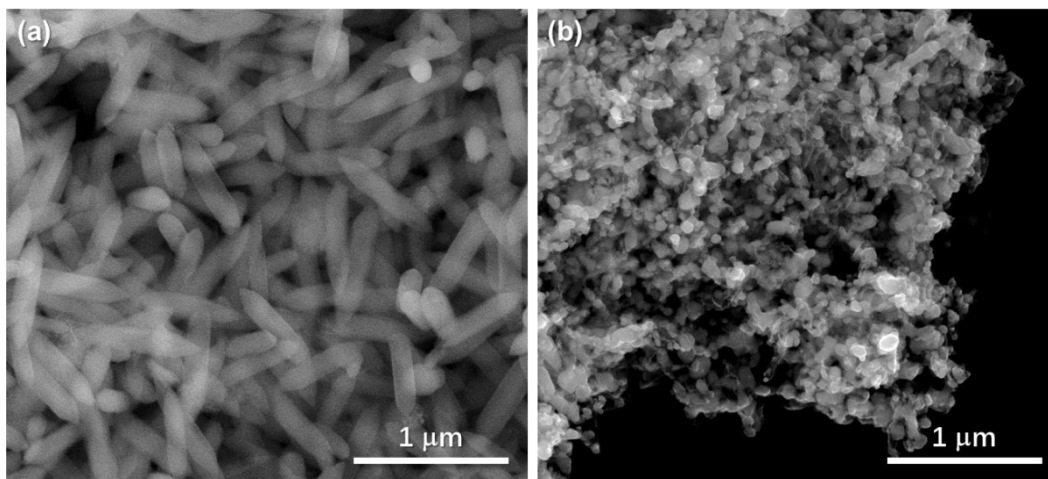

**Fig. S2.** SEM images of (a) MOF precursor NiFe-MIL-88 without GO and (b) NiFe-P after thermal treatments

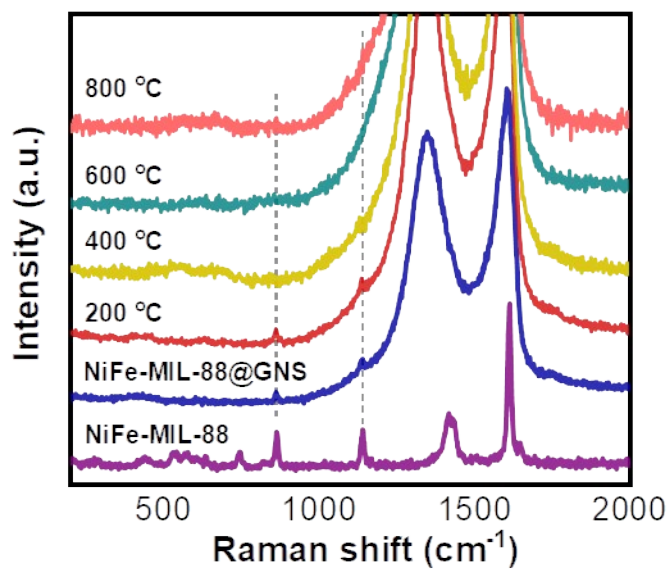

**Fig. S3.** Raman spectra of the pristine MOF and NiFe-C@GNS samples with various pyrolysis temperatures

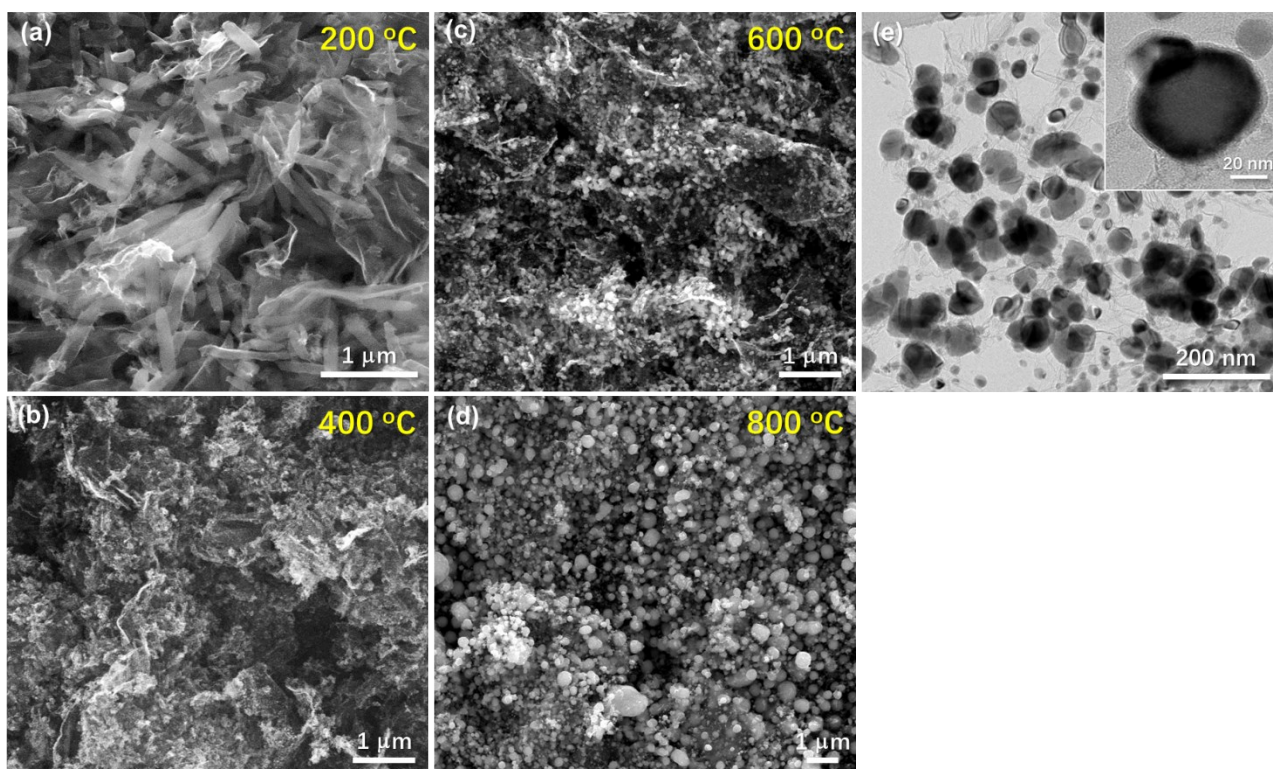

**Fig. S4.** (a-d) SEM images of the NiFe-C@GNS samples with various pyrolysis temperatures, and (e) TEM image of NiFe-C@GNS under 600 °C pyrolysis

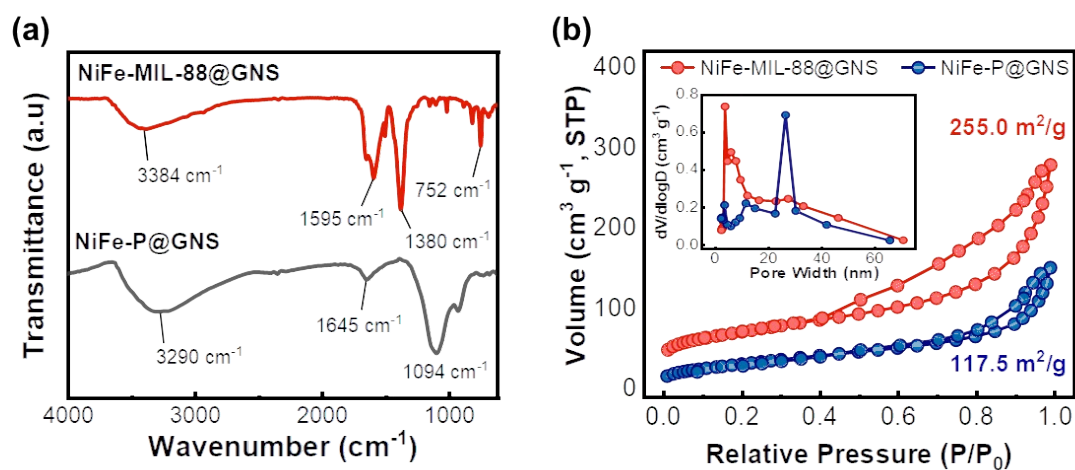

**Fig. S5.** (a) FT-IR spectra of NiFe-MIL-88@GNS and NiFe-P@GNS; (b) nitrogen adsorption-desorption isotherm and corresponding pore-size distribution plots (inset) of NiFe-MIL-88@GNS and NiFe-P@GNS

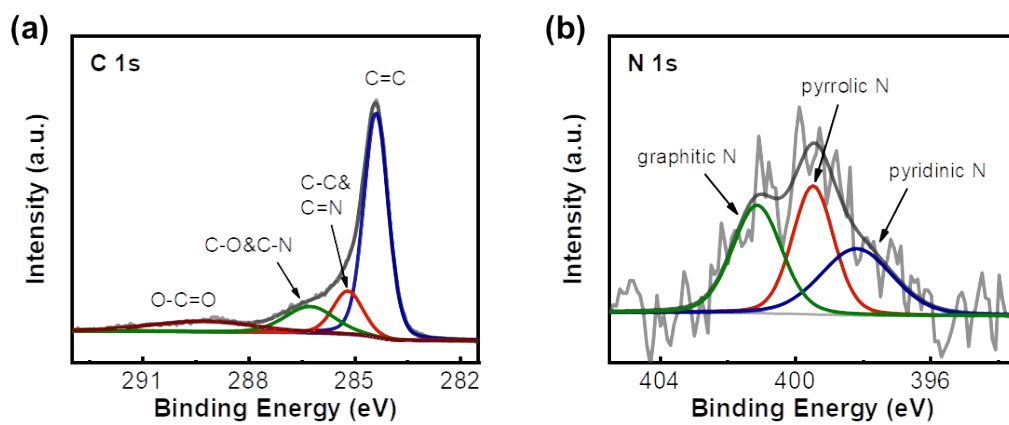

**Fig. S6.** XPS spectra of NiFe-P@GNS at (a) C 1s and (b) N 1s regions

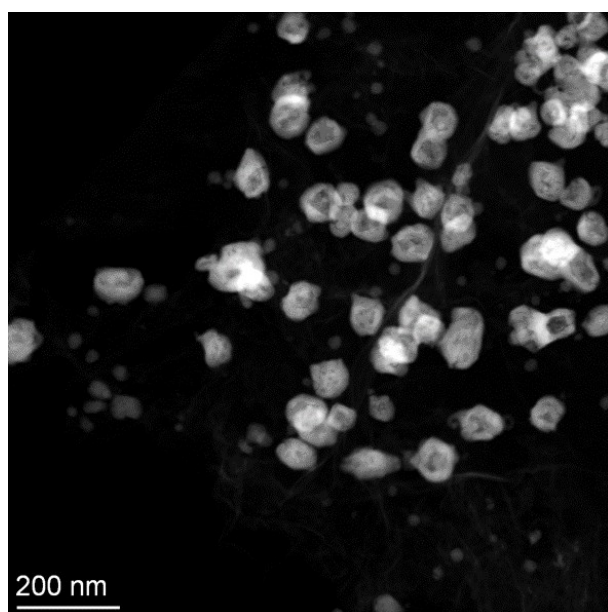

**Fig. S7.** TEM HAADF image of NiFe-P@GNS, showing a hollow nanosphere structure

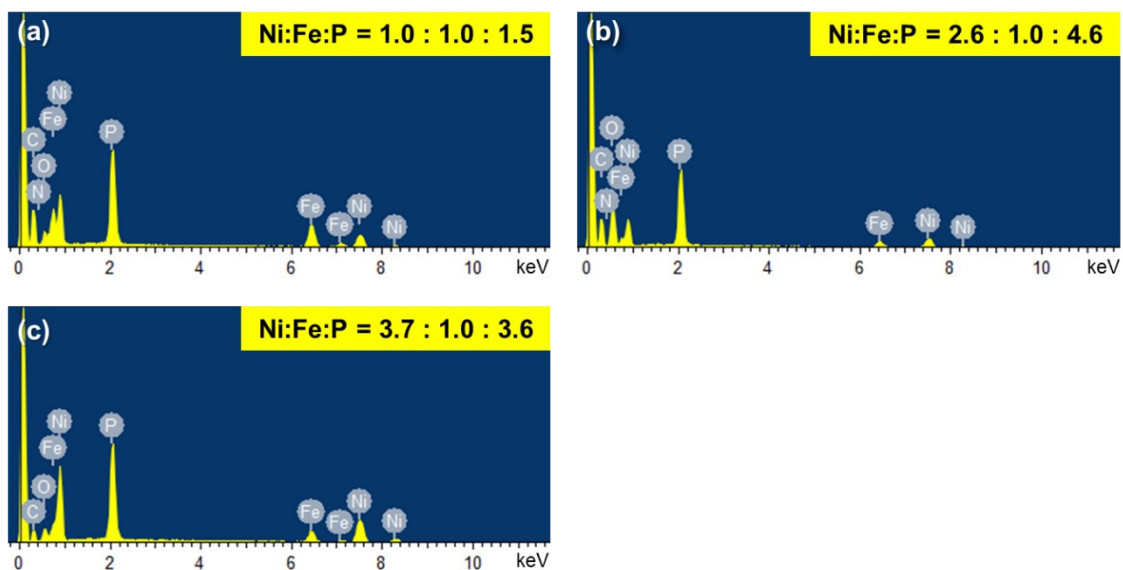

**Fig. S8.** EDX spectra of (a) Ni<sub>1.0</sub>Fe<sub>1.0</sub>-P, (b) Ni<sub>1.5</sub>Fe<sub>1.0</sub>-P, and (c) Ni<sub>2.0</sub>Fe<sub>1.0</sub>-P

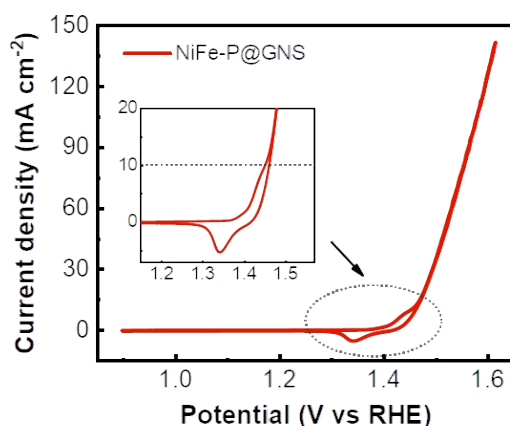

**Fig. S9.** CV plot of NiFe-P@GNS at scan rate of 5 mV s<sup>-1</sup>

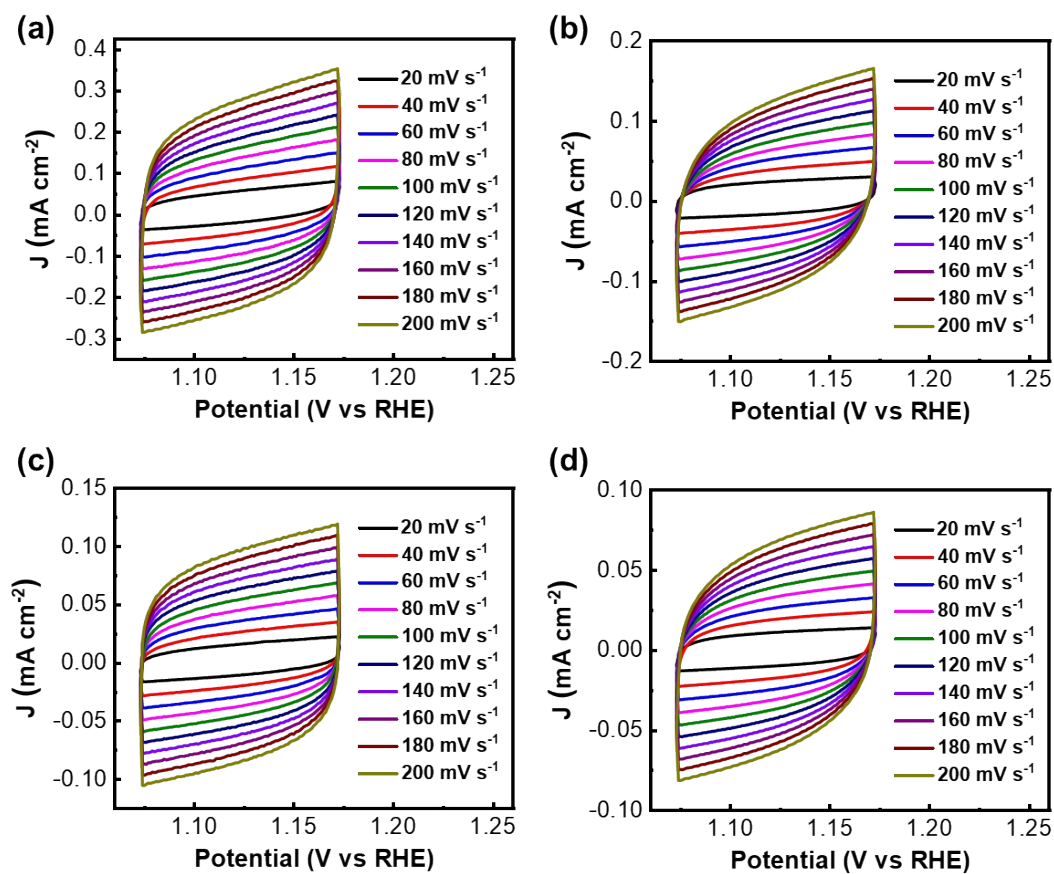

**Fig. S10.** CV scan curves at different scan rates for (a) NiFe-P@GNS, (b) Ni-P@GNS, (c) Fe-P@GNS and (d) NiFe-P

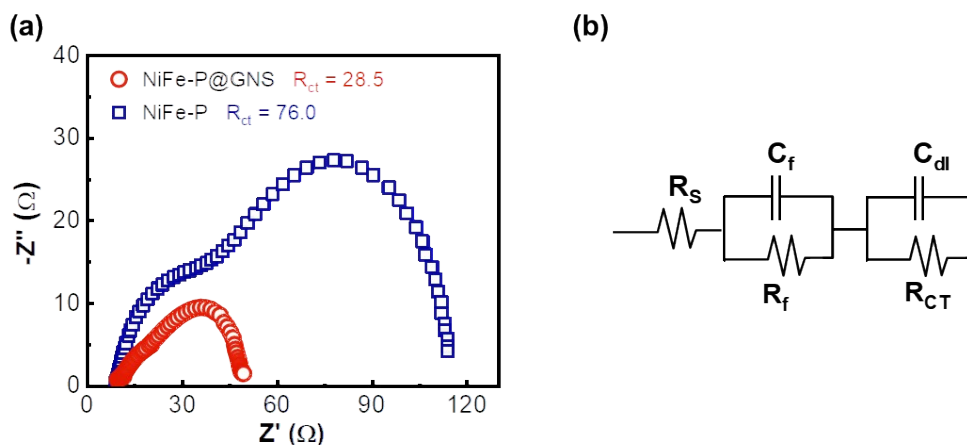

**Fig. S11.** (a) Nyquist plots (0.1 Hz-10 MHz) at overpotential of 300 mV in and (b) the equivalent circuits used for Nyquist plot fitting, in which  $R_s$  is the resistance of the electrolyte.  $R_f$  is the resistance of the catalyst layer and  $C_f$  is the capacitance.  $C_{dl}$  is the double layer capacitance and  $R_{ct}$  is the charge transfer resistance. In the high frequency region, the resistance is related to the uncompensated solution resistance, which is comparable for all catalysts.

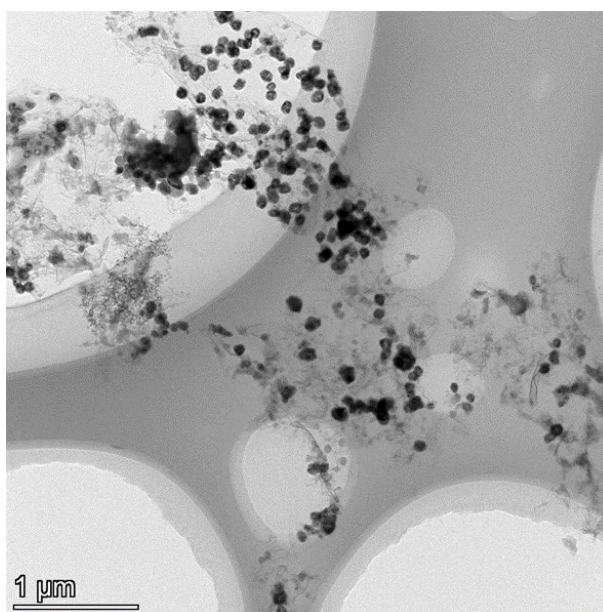

**Fig. S12.** TEM image of NiFe-P@GNS after 1000 CV cycles in OER



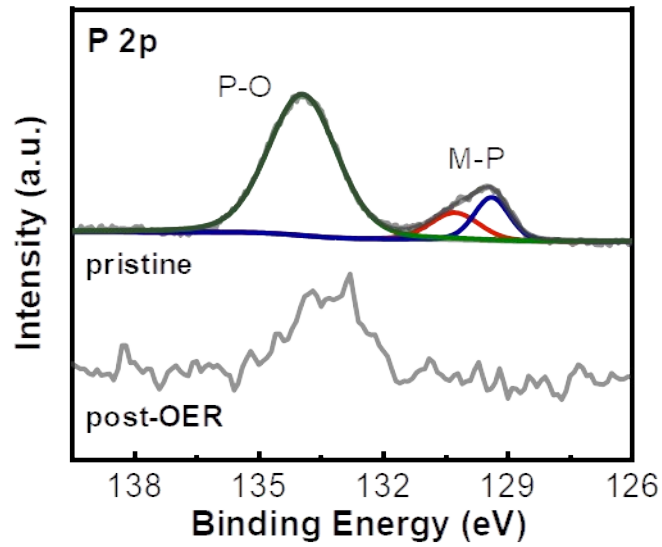

**Fig. S13.** XPS P 2p spectrum of NiFe-P@GNS before and after OER cycling test

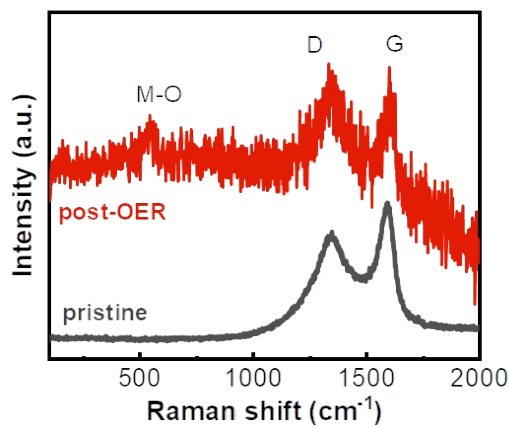

**Fig. S14.** Raman spectra of NiFe-P@GNS before and after 1000 CV cycles in OER

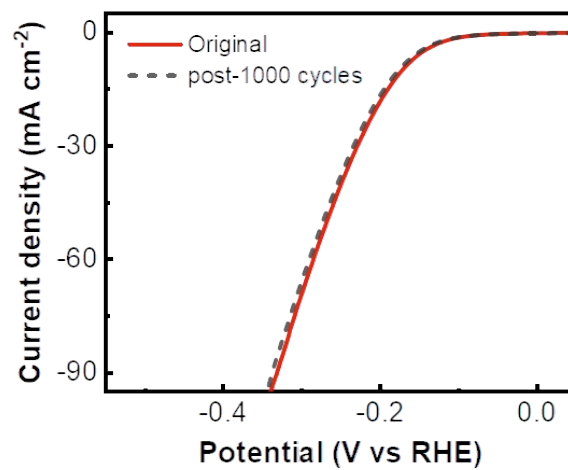

**Fig. S15.** HER LSV curves of NiFe-P@GNS before and after 1000 CV cycling test

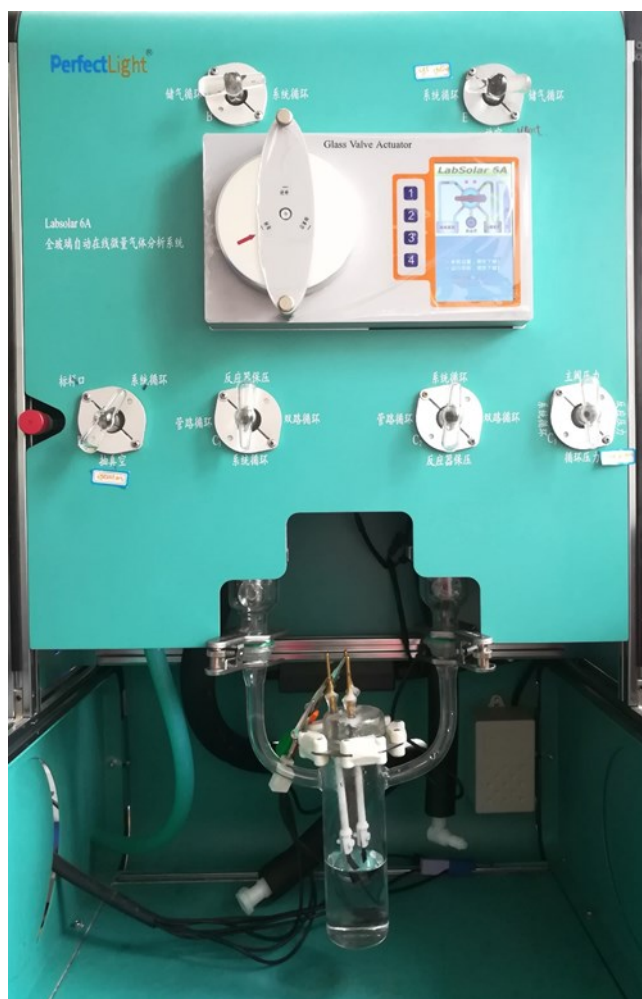

**Fig. S16.** Digital photographs of the setup of the water decomposition hydrogen production system

| Samples                                     | Potential (V) @10mA cm <sup>-2</sup> | References                               |
|---------------------------------------------|--------------------------------------|------------------------------------------|
| NiFe-P@GNS                                  | 1.578                                | This work                                |
| Co <sub>2</sub> P/Ni <sub>2</sub> P-2%Mo    | 1.57                                 | Appl. Catal. B-Environ., 269(2020)118951 |
| Co <sub>0.6</sub> Fe <sub>0.4</sub> P-1.125 | 1.57                                 | Chem. Sci.10 (2019) 464                  |
| FCP@NG                                      | 1.63                                 | Nanoscale 11 (2019) 12837                |
| CoP/NCNHP                                   | 1.64                                 | J. Am. Chem. Soc. 140 (2018) 2610        |
| NiS/NiS <sub>2</sub>                        | 1.62                                 | J. Mater. Chem. A 6 (2018) 8233          |
| Co <sub>4</sub> Ni <sub>1</sub> P NTs       | 1.59                                 | Adv. Funct. Mater., 27(2017) 1703455     |
| NiCoP/rGO                                   | 1.59                                 | Adv. Funct. Mater., 26(2016) 6785        |
| N-NiMoO <sub>4</sub> /NiS <sub>2</sub>      | 1.60                                 | Adv. Funct. Mater., 29(2019) 1805298     |
| NiS/NiS <sub>2</sub>                        | 1.62                                 | J. Mater. Chem. A, 6(2018) 8233          |
| MoS <sub>2</sub> -NiS <sub>2</sub> /NGF     | 1.64                                 | Appl. Catal. B-Environ.,254 (2019) 15    |
| Ni@NC-800                                   | 1.60                                 | Adv. Mater., 29(2017) 1605957            |
| CoN <sub>x</sub> @GDY NS/NF                 | 1.48                                 | Nano Energy 59 (2019) 591                |

**Table S1.** Summary of overall water-splitting performance of recently reported catalysts
